# Supplementary material for: A Suggested New Bacteriophage Genus, “Kp34likevirus”, within the Autographivirinae Subfamily of Podoviridae
Source: MDPI journal article supplement (doi:10.3390/v7041804), 2015-04-07
Supplement: s1 [file s1]

Table S2. Investigated host ranges of the "Kp34likeviruses"

| Strain         | SU503 | SU552A | NTUH-K2044- K1-1 | KP34 |
|----------------|-------|--------|------------------|------|
| 07RAFM-KPN-501 | -     | -      | -                | COL  |
| 07RAFM-KPN-502 | -     | -      | -                | COL  |
| 07RAFM-KPN-503 | CCL   | -      | -                | COL  |
| 07RAFM-KPN-505 | -     | -      | -                | COL  |
| 07RAFM-KPN-506 | -     | -      | -                | -    |
| 07RAFM-KPN-507 | -     | -      | -                | -    |
| 07RAFM-KPN-510 | CCL   | -      | -                | COL  |
| 07RAFM-KPN-511 | -     | -      | -                | COL  |
| 07RAFM-KPN-512 | -     | -      | -                | -    |
| 07RAFM-KPN-513 | -     | -      | -                | COL  |
| 07RAFM-KPN-514 | -     | -      | -                | -    |
| 07RAFM-KPN-515 | -     | COL    | -                | -    |
| 07RAFM-KPN-524 | -     | -      | -                | -    |
| 07RAFM-KPN-525 | -     | -      | -                | -    |
| 07RAFM-KPN-527 | -     | -      | -                | -    |
| 07RAFM-KPN-534 | -     | -      | -                | -    |
| 07RAFM-KPN-537 | -     | -      | -                | -    |
| 07RAFM-KPN-542 | -     | -      | -                | -    |
| 07RAFM-KPN-549 | -     | -      | -                | -    |
| 07RAFM-KPN-550 | -     | -      | -                | -    |
| 07RAFM-KPN-552 | -     | CCL    | -                | -    |
| 07RAFM-KPN-557 | -     | -      | -                | -    |
| 07RAFM-KPN-559 | -     | -      | -                | -    |
| 07RAFM-KPN-566 | -     | -      | -                | -    |
| KPN 77         | -     | -      | -                | CCL  |
| NTUH-K2044     | -     | -      | CCL              |      |

CCL - confluent clear lysis; COL - confluent opaque lysis; dash - no lysis
