# Supplementary material for: A Suggested New Bacteriophage Genus, “Kp34likevirus”, within the Autographivirinae Subfamily of Podoviridae
Source: MDPI journal article supplement (doi:10.3390/v7041804), 2015-04-07
Supplement: s1 [file s1]

Table S1. *Klebsiella pneumoniae* strains used in this study

| Strain         | Resistance mechanism                       | Antibiogram | PFGE type | Country of isolation | Reference |
|----------------|--------------------------------------------|-------------|-----------|----------------------|-----------|
| 07RAFM-KPN-501 | ESBL-A CTX-M group 1                       | Gen         | KP-05     | Sweden               | [10]      |
| 07RAFM-KPN-502 | n (SHV wt)                                 | Tmp         | nt        | Sweden               | [10]      |
| 07RAFM-KPN-503 | n (SHV wt)                                 | Tmp         | nt        | Sweden               | [10]      |
| 07RAFM-KPN-505 | ESBL-A SHV S238                            | Tmp         | S         | Sweden               | [10]      |
| 07RAFM-KPN-506 | ESBL-A CTX-M group 9                       | Tmp         | S         | Sweden               | [10]      |
| 07RAFM-KPN-507 | ESBL-A CTX-M group 1, ESBL-A SHV S238      | CipGenTmp   | KP-03     | Sweden               | [10]      |
| 07RAFM-KPN-510 | ESBL-A CTX-M group 9, ESBL-A SHV S238      | CipGenTmp   | KP-07     | Sweden               | [10]      |
| 07RAFM-KPN-511 | ESBL-A CTX-M group 1                       | CipTmp      | S         | Sweden               | [10]      |
| 07RAFM-KPN-512 | ESBL-A CTX-M group 1                       | CipGenTmp   | S         | Sweden               | [10]      |
| 07RAFM-KPN-513 | ESBL-A CTX-M group 1, ESBL-A SHV S238+K240 | CipTmp(Tob) | S         | Sweden               | [10]      |
| 07RAFM-KPN-514 | ESBL-A CTX-M group 1                       | CipTmp(Tob) | KP-01     | Sweden               | [10]      |
| 07RAFM-KPN-515 | n (SHV wt)                                 | Tmp         | nt        | Sweden               | [10]      |
| 07RAFM-KPN-524 | ESBL-A CTX-M group 9                       |             | S         | Sweden               | [10]      |
| 07RAFM-KPN-525 | n (SHV wt)                                 | Tmp         | nt        | Sweden               | [10]      |
| 07RAFM-KPN-527 | ESBL-A CTX-M group 1                       | CipTmp      | KP-01     | Sweden               | [10]      |
| 07RAFM-KPN-534 | n (SHV wt)                                 |             | S         | Sweden               | [10]      |
| 07RAFM-KPN-537 | ESBL-A SHV S238+K240                       | CipTmp(Tob) | S         | Sweden               | [10]      |
| 07RAFM-KPN-542 | ESBL-A CTX-M group 1                       | Tmp         | S         | Sweden               | [10]      |
| 07RAFM-KPN-549 | ESBL-M DHA                                 | CipTmp(Tob) | S         | Sweden               | [10]      |
| 07RAFM-KPN-550 | ESBL-A CTX-M group 1                       | Tmp         | S         | Sweden               | [10]      |
| 07RAFM-KPN-552 | ESBL-A SHV S238+K240                       | GenTmp      | KP-02     | Sweden               | [10]      |
| 07RAFM-KPN-557 | ESBL-A CTX-M group 1                       |             | KP-04     | Sweden               | [10]      |
| 07RAFM-KPN-559 | ESBL-A CTX-M group 1                       | Tmp         | S         | Sweden               | [10]      |
| 07RAFM-KPN-566 | ESBL-A CTX-M group 1, ESBL-A SHV S238      | Tmp         | S         | Sweden               | [10]      |
| KPN 77         |                                            |             |           | Poland               | [5]       |
| NTUH-K2044     |                                            |             |           | Taiwan               | [12]      |

All 07RAFM strains were isolated during 2007
